# Supplementary material
Source: publisher site journal article supplement (https://www.dovepress.com/article/396076)
Supplement: Supplementary file 1 [file get_supplementary_file.php]

Supplementary table 1 The primers of the selected SNPs

| SNP | 1st-PCRP | 2nd-PCRP | UEP_SEQ | Director |
| --- | --- | --- | --- | --- |
| rs6598163 | ACGTTGGATGTCATGTACTACGCCCTCAAG | ACGTTGGATGTGGAGAAGTCGATCTGGATG | gaggTCTGGATGTCGGCGG | R |
| rs34515698 | ACGTTGGATGACCCGAGGAGCGGAAGGTC | ACGTTGGATGATAACGACGGCTACCCCTTC | ggggtGGACACCCACTTTGACGATGA | F |
| rs7975920 | ACGTTGGATGCTCTCCCTCCTCTTCTCAG | ACGTTGGATGTCCAGCACTTTCCAGTACTC | gaTGGCCACGGAAGAAGTAG | R |

SNP, single nucleotide polymorphism; PCRP, polymerase chain reaction primer; UEP, unextended mini sequencing primer; SEQ, sequence

Supplementary table 2 The basic information of subjects’ characteristics

| Variable | Mean ± SE | | *p*-value |
| --- | --- | --- | --- |
| Control (N=670) | Case (N=675) |
| Age (Mean ± SE, years) | 55.61±0.35 | 54.91±0.26 | 0.107a |
| >55 | 293 | 381 |  |
| ≤55 | 377 | 294 |  |
| Gender |  |  | 0.500b |
| Male | 440 | 455 |  |
| Female | 230 | 220 |  |
| Smoking |  |  | 0.608b |
| Yes | 328 | 321 |  |
| No | 342 | 354 |  |
| Drinking |  |  | 0.684b |
| Yes | 334 | 329 |  |
| No | 336 | 346 |  |

SE: standard error.

*p*a-value was calculated by Student’s *t*-test.

*p*b-value was calculated by Pearson′s χ2 test.

Supplementary table 3 The relationship between genotypes at different loci and clinical parameters

| SNP-ID | Variable | Genotype | Mean ± SE | |
| --- | --- | --- | --- | --- |
| Control | Case |
| rs6598163 | Alanine aminotransferase | A/A | 25.71±15.89 | 25.98±15.27 |
|  |  | G/A | 30.02±22.87 | 25.13±17.74 |
|  |  | G/G | 25.18±15.26 | 33.37±25.32 |
|  |  |  | **0.010** | **0.047** |
|  | Aspartate aminotransferase | A/A | 24.31±8.34 | 24.38±14.90 |
|  |  | G/A | 26.10±9.84 | 23.90±12.89 |
|  |  | G/G | 24.42±7.86 | 34.55±31.35 |
|  |  |  | **0.044** | **0.006** |
|  | Platelet count | A/A | 225.88±60.72 | 204.46±67.40 |
|  |  | G/A | 211.21±57.63 | 201.42±67.00 |
|  |  | G/G | 213.03±56.11 | 196.04±64.95 |
|  |  |  | **0.024** | 0.774 |
|  | Platelet specific volume | A/A | 0.25±0.06 | 0.46±1.76 |
|  |  | G/A | 0.24±0.05 | 0.22±0.06 |
|  |  | G/G | 0.24±0.05 | 0.21±0.05 |
|  |  |  | **0.021** | **0.012** |
|  | Albumin | A/A | 45.96±2.56 | 42.81±4.16 |
|  |  | G/A | 45.78±2.49 | 41.42±4.34 |
|  |  | G/G | 45.79±2.43 | 40.96±3.97 |
|  |  |  | 0.727 | **0.029** |
|  | Total bilirubin | A/A | 16.00±5.36 | 13.57±5.81 |
|  |  | G/A | 17.01±6.33 | 11.43±3.67 |
|  |  | G/G | 16.54±6.54 | 12.94±3.91 |
|  |  |  | 0.079 | **0.014** |
|  | Leukocyte count | A/A | 5.87±1.67 | 8.95±4.29 |
|  |  | G/A | 5.86±1.53 | 7.49±3.36 |
|  |  | G/G | 5.82±1.48 | 7.23±3.43 |
|  |  |  | 0.940 | **0.010** |
| rs7975920 | Triglyceride | G/G | 1.88±1.29 | 1.56±0.90 |
|  |  | G/C | 1.74±1.08 | 1.99±1.36 |
|  |  | C/C | 1.89±1.01 | 1.58±0.69 |
|  |  |  | 0.368 | **0.027** |
|  | Leukocyte count | G/G | 5.88±1.50 | 7.37±3.27 |
|  |  | G/C | 5.81±1.63 | 8.61±4.24 |
|  |  | C/C | 5.84±1.53 | 6.82±2.75 |
|  |  |  | 0.823 | **0.020** |
|  | Percentage of monocytes | G/G | 6.98±1.85 | 6.23±2.08 |
|  |  | G/C | 7.06±1.84 | 5.43±2.73 |
|  |  | C/C | 6.89±2.36 | 3.46±2.60 |
|  |  |  | 0.801 | **0.000** |
|  | Basophil count | G/G | 0.14±0.11 | 0.13±0.16 |
|  |  | G/C | 0.13±0.12 | 0.11±0.10 |
|  |  | C/C | 0.12±0.10 | 0.10±0.10 |
|  |  |  | 0.644 | **0.012** |
|  | Platelet specific volume | G/G | 0.24±0.06 | 0.21±0.06 |
|  |  | G/C | 0.24±0.06 | 0.22±0.06 |
|  |  | C/C | 0.25±0.07 | 0.85±2.82 |
|  |  |  | 0.518 | **0.014** |
|  | Red blood cell count | G/G | 4.88±0.46 | 4.84±0.53 |
|  |  | G/C | 4.86±0.44 | 4.67±0.71 |
|  |  | C/C | 4.78±0.47 | 4.47±0.83 |
|  |  |  | 0.419 | **0.021** |
|  | Mean hemoglobin concentration | G/G | 336.56±12.19 | 323.5±16.75 |
|  |  | G/C | 337.73±11.00 | 320.9±18.41 |
|  |  | C/C | 333.5±9.02 | 299.57±76.00 |
|  |  |  | 0.079 | **0.010** |

SE: standard error.

*p*-value was calculated by Pearson′s χ2 test.

Bold values indicated that the *p*-value was statistically significant.
